# FTO Gene Variant and Risk of Overweight and Obesity among Children and Adolescents: a Systematic Review and Meta-Analysis

Chibo Liu\*, Sihua Mou, Yangqun Cai

Department of Clinical Laboratory, Taizhou Municipal Hospital, Taizhou, Zhejiang, China

## Abstract

**Objective:** The fat mass and obesity associated gene (FTO) polymorphisms have been implicated in the susceptibility of overweight/obesity in children and adolescents. However, the results have been inconsistent. In this study, we performed a meta-analysis to clarify the association of FTO gene polymorphisms with overweight/obesity risk among children and adolescents.

**Methods:** PubMed and Embase were used to search for eligible published literatures. Pooled odds ratios (ORs) with 95% confidence intervals (CIs) were calculated using random- or fixed-effect models.

**Results:** A total of 21 articles containing 23 studies (11208cases and 35015controls) were included in our analysis. The results indicated that variant in FTO gene was significantly associated with increased risk of overweight/obesity in children and adolescents (OR=1.35; 95%CI: 1.27-1.44;  $P<0.001$ ). The overall pooled ORs for risk obesity and overweight were 1.34 (95%CI: 1.21-1.48) and 1.35 (95%CI: 1.25-1.47), respectively. Subgroup analyses also showed similar trends in most subgroups of adjustment for covariates and unadjustment, different ethnicities (Caucasians, Asians, and Amerindians), and each of three investigated polymorphisms (rs9939609, rs1421085, and rs1558902).

**Conclusions:** The present meta-analysis suggested a positive association between FTO gene polymorphism and overweight/obesity risk among children and adolescents. Further prospective studies should be recommended to confirm the observed association, and underlying mechanism should be investigated to clarify the association of FTO gene polymorphism with overweight/obesity.

**Citation:** Liu C, Mou S, Cai Y (2013) FTO Gene Variant and Risk of Overweight and Obesity among Children and Adolescents: a Systematic Review and Meta-Analysis. PLoS ONE 8(11): e82133. doi:10.1371/journal.pone.0082133

**Editor:** Yi-Hsiang Hsu, Harvard Medical School, United States of America

**Received:** August 13, 2013; **Accepted:** October 21, 2013; **Published:** November 22, 2013

**Copyright:** © 2013 Liu et al. This is an open-access article distributed under the terms of the Creative Commons Attribution License, which permits unrestricted use, distribution, and reproduction in any medium, provided the original author and source are credited.

**Funding:** The authors have no support or funding to report.

**Competing interests:** The authors have declared that no competing interests exist.

\* E-mail : chibo\_liu@163.com

## Introduction

Obesity, which is associated with an increased risk of many chronic diseases, including type-2 diabetes, cardiovascular diseases and cancer, has become a major health problem worldwide [1]. More than 400 million people are obese across the world and the number will reach 700 million by 2015, according to the World Health Organization. Obesity is also increasingly prevalent among children and adolescents. Approximately 38.1% and 16.9% of children and adolescents in US are overweight and obesity, respectively[2]. If obese occurs during childhood, especially at adolescence, it is more likely to remain obese when an individual become adult as well as increases the risk of adult morbidity and mortality [3-5]. Therefore, overweight/obesity in childhood not only influences health and well-being during childhood and adolescence, but

also has potential long-term health consequences for later adult chronic diseases.

Obesity is a complex multifactor disease that is affected by environmental risk factors and biological ones (including monogenic variations and common genetic variants)[6]. Approximately 40%-70% adult obesity is attributed to genetic factors[5]. Recently, many single nucleotide polymorphisms (SNPs) were identified by genome-wide association studies (GWASs) in adults and children with respect to the pathogenesis of obesity, including *FTO*, *TMEM18*, *GNPDA2*, *INSIG2*, *MC4R*, *NEGR1*, *1q25*, *BDNF* and *KCTD15*[7]. *FTO*, a gene located in chromosome region 16q12.2, was the first identified gene for common obesity[8]. Subsequently, the association of *FTO* variants with BMI and obesity has been investigated in different ethnic populations. A previous meta-analysis by Peng et al. [9] indicated the association between

FTO gene polymorphisms and obesity risk. However, the paper by Peng et al. was mainly based on adult populations and only limited studies on children populations were included. Indeed, the results are still inconsistent in children populations. In this study, a meta-analysis was performed to clarify the association of common genetic variants in *FTO* with overweight/obesity risk in children and adolescents.

## Materials and Methods

### Literature and search strategy

We searched the literature databases including PubMed and Embase from 2007 to 2013 since rs9939069 polymorphism in *FTO* gene and its association with obesity was first reported in 2007. The search strategy to identify all possible studies involved the use of the following keywords: (fat mass and obesity associated gene OR *FTO*) and (polymorphism OR variant OR variation OR genotype) and (children OR adolescents) and (obesity OR overweight). The publication language was restricted to English. The reference lists of retrieved articles were hand-searched. If more than one article were published using the same case series, only the study with largest sample size was included. The literature search was updated on 20 June 2013.

### Inclusion criteria and data extraction

The included studies fulfilled the following inclusion criteria: (1) an original report evaluating the association of any of the *FTO* polymorphisms with overweight/obesity risk; (2) using case-control, cross-sectional, or cohort design; (3) providing an odds ratio (OR) or relative risk (RR) with 95% confidence interval (CI) under an additive model or sufficient raw data to calculate it; and (4) participants should be children and/or adolescents. The following information was extracted from each study: (1) name of the first author; (2) year of publication; (3) origin of country; (4) ethnicity of studied population; (5) number of cases and controls; (6) mean age and body mass index (BMI) of subjects; (7) OR or RR with 95% CI under an additive model; (8) adjustment for covariates; (9) studied SNPs; (10) genotype distribution in cases and controls; and (11) *P* value for Hardy-Weinberg equilibrium (HWE) test in controls. Two authors independently assessed the articles for compliance with the inclusion/exclusion criteria, and resolved discrepancies by group discussion until reaching a consistent decision.

### Statistical analysis

The association between *FTO* polymorphism and overweight/obesity risk was estimated by calculating pooled OR with 95%CI under an additive model. The significance of pooled OR was determined by *Z* test ( $P < 0.05$  was considered statistically significant). The between-study heterogeneity was evaluated by *Q* statistic and *I*<sup>2</sup> index [10]. A random-(DerSimonian-Laird method [11]) or fixed-(Mantel-Haenszel method [12]) effects model was used to calculate pooled OR in the presence ( $P < 0.10$ ) or absence ( $P > 0.10$ ) of heterogeneity, respectively. Subgroup analyses were conducted by ethnicity,

adjustment, *FTO* SNP, and category of cases. Sensitivity analysis, after removing one study at a time, was performed to evaluate the stability of the results. Begg's funnel plot [13], a scatter plot of effect against a measure of study size, was generated as visual aid to detect bias or systematic heterogeneity. Publication bias was assessed by Begg's test [13] and Egger's test [14] ( $P < 0.05$  was considered statistically significant). Data analysis was performed using STATA version 11 (StataCorp LP, College Station, TX, USA).

## Results

### Characteristics of the included studies

Figure 1 provides the detailed process of articles' selection. A total of 321 articles were identified from the primary literature search. After review of the titles and abstracts, 271 were excluded because of obvious irrelevance. 50 potentially relevant articles remained for further full-text evaluation. Of these, 3 articles were excluded because of non-English articles, 4 articles were excluded as they did not have control groups, 6 articles were excluded due to duplicate publications, and 6 articles were excluded since they assessed the association between BMI and *FTO* gene polymorphism. Furthermore, 5 papers which did not provide available information about the genotype frequencies of *FTO* or the ORs and 95% CIs were also excluded [15-19]. 3 papers were excluded as the controls were adults [20-22]. One report without using additive model to calculate OR was excluded [23]. And one paper was also excluded for studying early onset and morbid obesity of adult when they were before 14 years old [24]. Consequently, 21 eligible articles met the inclusion criteria. If the article contained two or more studies, they were included as separate study in the data analysis. As a result, 21 articles containing 23 studies (11208 cases and 35015 controls) were included in the final meta-analysis.

The genotypes in the controls of all included studies were in Hardy-Weinberg equilibrium, except for two those were unknown [25,26] and two studies stated *P* for HWE was  $> 0.01$  [41,43]. In addition, there were 14 studies for rs9939609 [8,25,27-37], 4 studies for rs1421085 [38-41], 3 studies for rs1558902 [26,42,43], 2 studies for rs8050136 [44]. Owing to the high linkage disequilibrium with the other *FTO* SNPs ( $r^2 > 0.85$ ), rs9939609 was considered as the surrogate polymorphism. The ethnicities varied across studies: 16 were on Caucasian population [8,25-28,31,33,35-40,43,44], 4 were on Asian population [29,30,32,42], 2 was on Amerindian population [34,41], and 1 was on African population [44]. As most ORs or RRs and 95% CIs of studies were generated under an additive genetic model, the final pooled estimate was under this model. The characteristics of the included studies are shown in Table 1.

### Quantitative assessment

Regarding to the association of *FTO* rs9939609 (or its proxy) with risk of overweight/obesity in children and adolescents, there was evidence of heterogeneity between studies ( $P < 0.001$ ,  $I^2 = 67.0\%$ ). Therefore, the random effect model was used. The result showed a statistically significant association

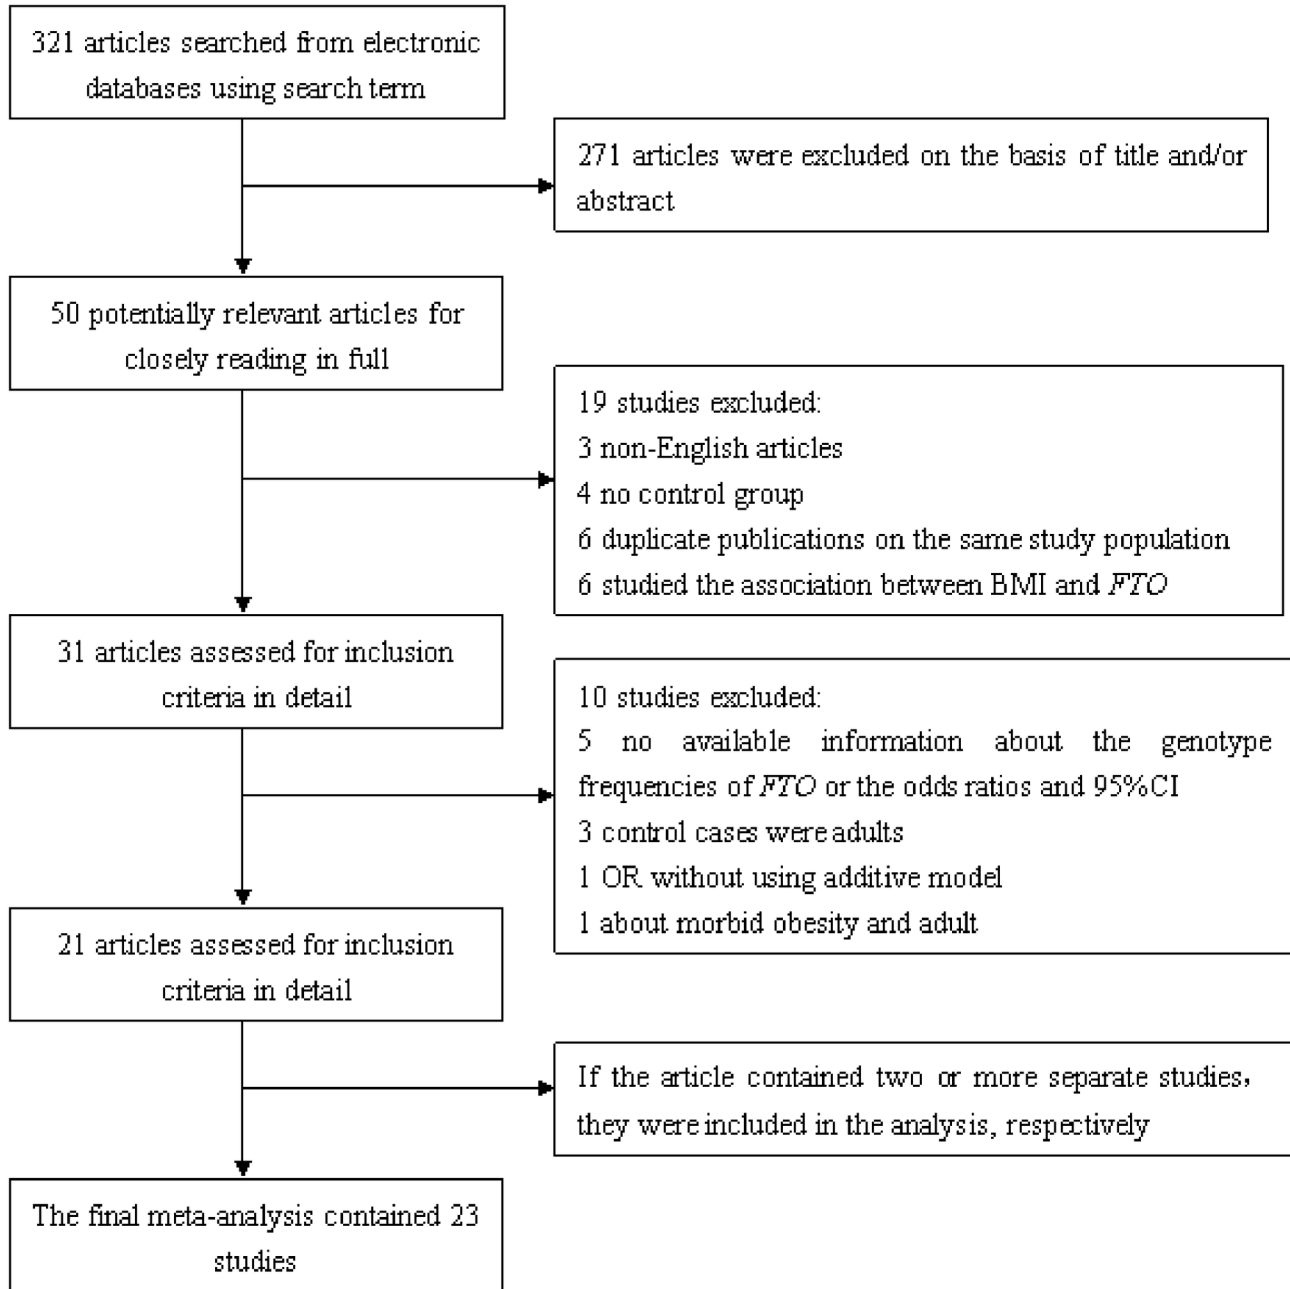

**Figure 1. Flow chart of article selection for meta-analysis.**

doi: 10.1371/journal.pone.0082133.g001

between rs9939609 and overweight/obesity, with an overall OR of 1.35 (95%CI=1.27-1.44; Figure 2). Since the underlying etiology of overweight and obesity may be different and genetic variation may have different effects on them, further analysis based on categories of cases were performed. The overall pooled OR of risk obesity was 1.34(95%CI: 1.21-1.48, Figure 2), with evidence of heterogeneity between studies ( $I^2=74.5%$ ;  $P<0.001$ ). The overall pooled OR of risk overweight was 1.35(95%CI: 1.25-1.47, Figure 2), with moderate of heterogeneity between studies ( $I^2=51.0%$ ,  $P=0.031$ ). In the

stratified analysis by adjustment, the pooled summary OR with the adjusted data showed significant association (OR=1.29; 95%CI: 1.23-1.35;  $I^2=17.4%$ ;  $P$  for heterogeneity=0.268), and the overall analysis without adjusted data also showed the similar result (OR=1.40; 95%CI: 1.23-1.59;  $I^2=79.2%$ ;  $P$  for heterogeneity<0.001). Further subgroup analysis stratified by ethnicity showed significant association between rs9939609 and overweight/obesity risk in Caucasians (OR=1.38; 95%CI: 1.29-1.49;  $I^2=62.3%$ ;  $P$  for heterogeneity<0.001), in Asians (OR=1.38; 95%CI: 1.16-1.65;  $I^2=61.4%$ ;  $P$  for

**Table 1.** Characteristics of studies included in meta-analysis.

| Study             | Year | Country  | Ethnicity  | FTO SNP   | Characteristics of cases <sup>a</sup> | Sample size |          | Mean age(years) |          | Mean BMI(kg/m <sup>2</sup> ) |             | OR          | 95%CI                         | P <sub>HWE</sub> <sup>b</sup> | Adjustment |
|-------------------|------|----------|------------|-----------|---------------------------------------|-------------|----------|-----------------|----------|------------------------------|-------------|-------------|-------------------------------|-------------------------------|------------|
|                   |      |          |            |           |                                       | Cases       | Controls | Cases           | Controls | Cases                        | Controls    |             |                               |                               |            |
| Frayling_a[8]     | 2007 | UK       | Caucasian  | rs9939609 | Overweight                            | 1304        | 3706     | 11              | 18.76    | 1.27                         | 1.16-1.39   | 0.658       | Gender                        |                               |            |
| Frayling_b[8]     | 2007 | Finland  | Caucasian  | rs9939609 | Overweight                            | 308         | 3895     | 14              | 19.23    | 1.15                         | 0.98-1.36   | 0.195       | Gender                        |                               |            |
| Dina[38]          | 2007 | Germany  | Caucasian  | rs1421085 | Overweight                            | 283         | 699      | 11.6            | 11.7     | 1.69                         | 1.38-2.06   | 0.87        | NA                            |                               |            |
| Wardle[27]        | 2008 | UK       | Caucasian  | rs9939609 | Obese                                 | 926         | 4022     | 10.7            | 10       | 1.76                         | 1.59-1.94   | 0.497       | NA                            |                               |            |
| Jacobsson[28]     | 2008 | Sweden   | Caucasian  | rs9939609 | Obese                                 | 450         | 510      | 12.6            | 17.1     | 1.254                        | 1.047-1.502 | 0.7567      | NA                            |                               |            |
| Grant_a[44]       | 2008 | America  | Caucasian  | rs8050136 | Obese                                 | 418         | 2270     | NA              | NA       | 1.266                        | 1.088-1.471 | equilibrium | NA                            |                               |            |
| Grant_b[44]       | 2008 | America  | African    | rs8050136 | Obese                                 | 578         | 1424     | NA              | NA       | 1.051                        | 0.914-1.207 | equilibrium | NA                            |                               |            |
| Meyre [39]        | 2009 | Germany  | Caucasian  | rs1421085 | Obese                                 | 370         | 710      | 11.8            | 11.8     | 1.498                        | 1.253-1.791 | 0.081       | NA                            |                               |            |
| Cauchi[40]        | 2009 | Finland  | Caucasian  | rs1421085 | Obese                                 | 247         | 4023     | 16              | 21.29    | 1.44                         | 1.19-1.75   | 0.222       | Age, gender                   |                               |            |
| Lee[29]           | 2010 | Korea    | Asian      | rs9939609 | Overweight                            | 140         | 571      | 8.05            | 8.16     | 1.53                         | 1.06-2.22   | 0.533       | Age, gender                   |                               |            |
| Xi[30]            | 2010 | China    | Asian      | rs9939609 | Obese                                 | 1229        | 2274     | 11.8            | 12.7     | 1.29                         | 1.11-1.5    | 0.146       | Age, gender                   |                               |            |
| Scherag[43]       | 2010 | Germany  | Caucasian  | rs1558902 | Overweight                            | 711         | 1803     | 10.71           | NA       | 1.35                         | 1.19-1.52   | >0.01       | Age, gender                   |                               |            |
| Mangge[31]        | 2011 | Austria  | Caucasian  | rs9939609 | Obese                                 | 268         | 103      | 12.5            | 14       | 1.341                        | 0.97-1.854  | 0.26        | NA                            |                               |            |
| Okuda[42]         | 2011 | Japan    | Asian      | rs1558902 | Overweight                            | 130         | 133      | NA              | NA       | 2.2                          | 1.43-3.38   | 0.613       | Gender                        |                               |            |
| Dwivedi[32]       | 2012 | India    | Asian      | rs9939609 | Overweight                            | 848         | 2147     | 13.45           | 13.51    | 1.21                         | 1.07-1.37   | 0.817       | Age, gender                   |                               |            |
| Luczynski[33]     | 2012 | Poland   | Caucasian  | rs9939609 | Overweight                            | 334         | 634      | 14.01           | NA       | 1.433                        | 1.187-1.73  | 0.886       | NA                            |                               |            |
| Riffo[34]         | 2012 | Chile    | Amerindian | rs9939609 | Obese                                 | 238         | 136      | 8.55            | 8.42     | 1.422                        | 1.068-1.868 | 0.06        | NA                            |                               |            |
| Moleres[36]       | 2012 | Spain    | Caucasian  | rs9939609 | Obese                                 | 208         | 146      | 11.6            | 11.5     | 1.419                        | 1.048-1.92  | 0.329       | NA                            |                               |            |
| Lauria[35]        | 2012 | Italy    | Caucasian  | rs9939609 | Overweight                            | 808         | 3597     | 6.06            | 16.37    | 1.41                         | 1.12-1.77   | 0.378       | Age, gender country of origin |                               |            |
| Alm[25]           | 2012 | Sweden   | Caucasian  | rs9939609 | Obese                                 | 524         | 527      | 12.7            | 17       | 1.25                         | 1.05-1.48   | NA          | Gender                        |                               |            |
| Ntalla[26]        | 2013 | Greece   | Caucasian  | rs1558902 | Overweight                            | 218         | 489      | 13.42           | 21.3     | 1.33                         | 1.06-1.67   | NA          | Age, gender                   |                               |            |
| Albuquerque[37]   | 2013 | Portugal | Caucasian  | rs9939609 | Obese                                 | 154         | 247      | 9               | 8.6      | 1.427                        | 1.071-1.9   | 0.732       | Age, gender                   |                               |            |
| Mejia-Benitez[41] | 2013 | Mexico   | Amerindian | rs1421085 | Obese                                 | 514         | 949      | 9.5             | 25       | 1.13                         | 0.93-1.38   | >0.01       | Age, gender                   |                               |            |

NA no available, OR odds ratio, CI confidence interval, SNP single nucleotide polymorphism

<sup>a</sup> The overweight group comprised overweight and obese children and adolescents <sup>b</sup> P value for Hardy-Weinberg equilibrium test (HWE) in controls

doi: 10.1371/journal.pone.0082133.t001

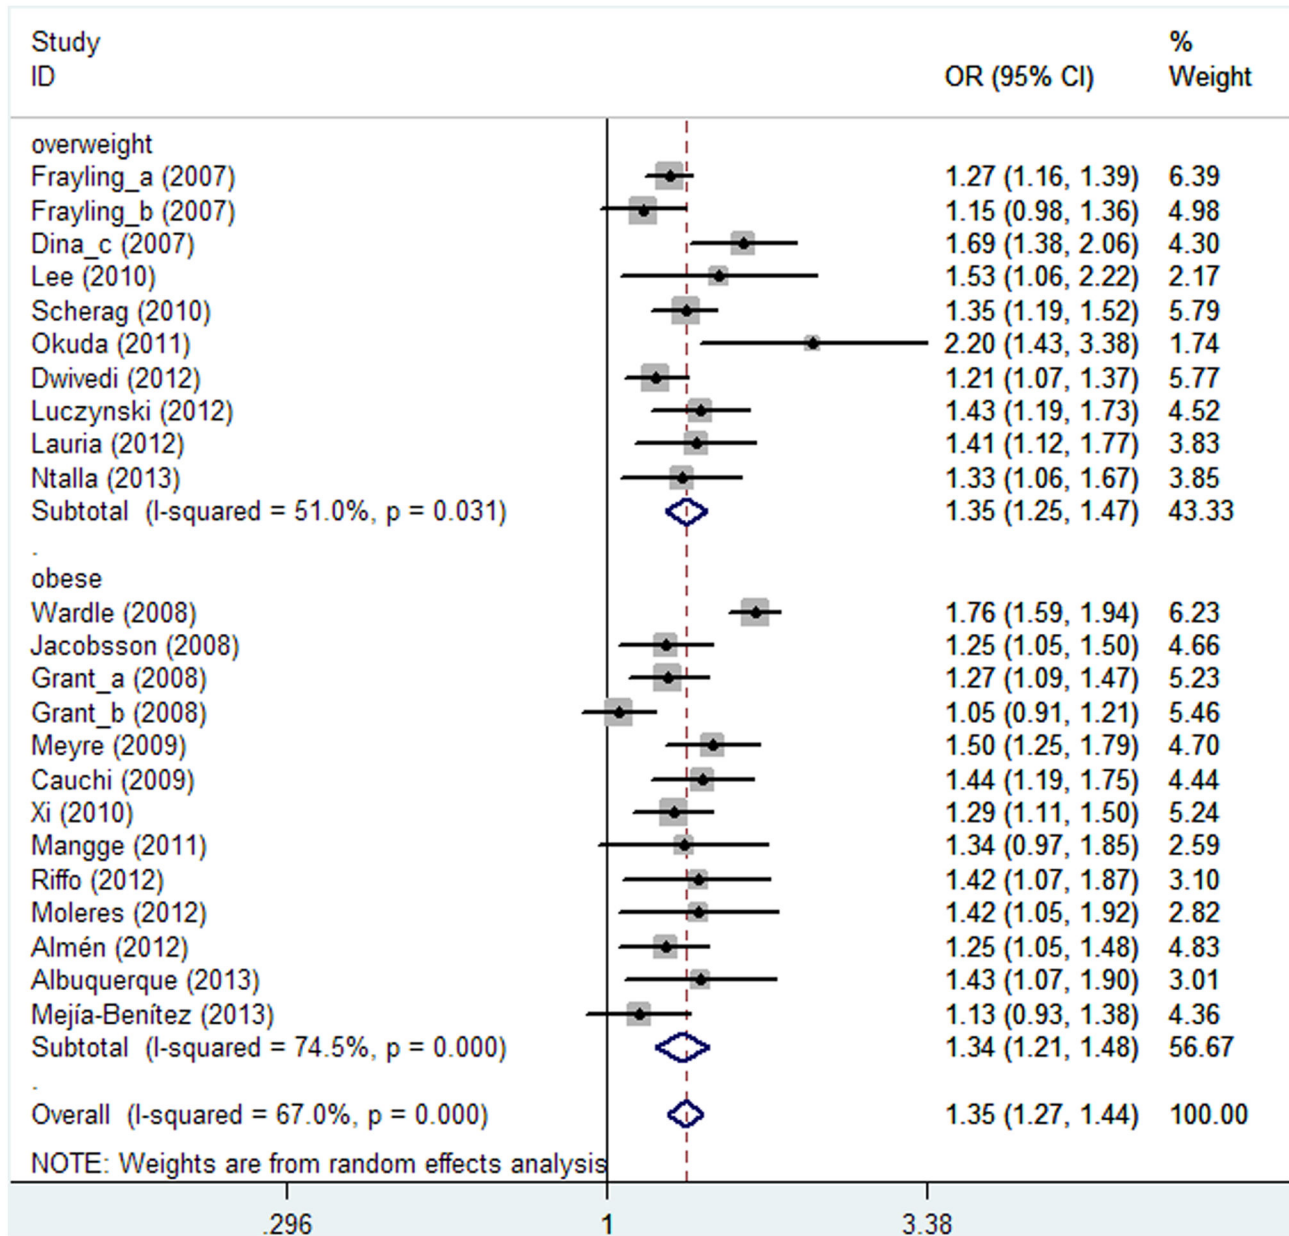

**Figure 2. Forest plot of meta-analysis of the association between rs9939609 (or its proxy) and overweight/obesity among children and adolescents under an additive model.**

doi: 10.1371/journal.pone.0082133.g002

heterogeneity=0.051), and in Amerindians (OR=1.22; 95%CI=1.04-1.43;  $I^2=42.3%$ ;  $P$  for heterogeneity=0.188), but not in Africans (OR=1.05; 95%CI: 0.91-1.21). In addition, we also performed a stratified analysis according to different polymorphisms. Except for rs8050136 (OR=1.15, 95%CI: 0.96-1.38), all the polymorphisms showed a strong correlation with increased risk of being overweight/obese (rs9939609: OR=1.35, 95%CI: 1.24-1.47; rs1421085: OR=1.43, 95%CI: 1.21-1.67; rs1558902: OR=1.46, 95%CI: 1.19-1.79). The results of subgroup analyses were showed in Table 2.

### Sensitivity analysis

To test the sensitivity of the meta-analysis, we excluded each study at one time. The corresponding pooled ORs were not materially altered. After excluding the two studies where the HWE of the genotypes in controls were unknown, and two studies where  $P$  for HWE was more than 0.01, the results did not substantially change, with ORs ranging from 1.30(95%CI: 1.25-1.35) to 1.38(95%CI:1.33-1.44). Thus, the significant association for rs9939609 with overweight/obesity risk was statistically robust by sensitivity analysis.

**Table 2.** Meta-analyses of association between *FTO* polymorphisms and overweight/obesity risk under an additive model

| Contrasts           | No.of study (cases/controls) | Statistical model | OR   | 95%CI     | $P_z^a$ | $I^2$ | $P_H^b$ |
|---------------------|------------------------------|-------------------|------|-----------|---------|-------|---------|
| All studies         | 23(11208/35015)              | Random            | 1.35 | 1.27-1.44 | <0.001  | 67    | <0.001  |
| Categories of cases |                              |                   |      |           |         |       |         |
| Obesity             | 13(6124/17341)               | Random            | 1.34 | 1.21-1.48 | <0.001  | 74.5  | <0.001  |
| Overweight          | 10(5084/17674)               | Random            | 1.35 | 1.25-1.47 | <0.001  | 51.0  | 0.031   |
| Ethnicity           |                              |                   |      |           |         |       |         |
| Caucasians          | 16(7531/27381)               | Random            | 1.38 | 1.29-1.49 | <0.001  | 62.3  | <0.001  |
| Asians              | 4(2347/5125)                 | Random            | 1.38 | 1.16-1.65 | <0.001  | 61.4  | 0.051   |
| Amerindians         | 2(752/1085)                  | Fixed             | 1.22 | 1.04-1.43 | 0.016   | 42.3  | 0.188   |
| Africans            | 1(578/1424)                  |                   | 1.05 | 0.91-1.21 | 0.483   |       |         |
| Adjustment          |                              |                   |      |           |         |       |         |
| Yes                 | 13(7135/24361)               | Fixed             | 1.29 | 1.23-1.35 | <0.001  | 17.4  | 0.268   |
| No                  | 10(4073/10654)               | Random            | 1.40 | 1.23-1.59 | <0.001  | 79.2  | <0.001  |
| Polymorphisms       |                              |                   |      |           |         |       |         |
| rs9939609           | 14(7739/22515)               | Random            | 1.35 | 1.24-1.47 | <0.001  | 66.4  | <0.001  |
| rs1421085           | 4(1414/6381)                 | Random            | 1.43 | 1.21-1.67 | <0.001  | 64.3  | 0.038   |
| rs1558902           | 3(1059/2425)                 | Random            | 1.46 | 1.19-1.79 | <0.001  | 57.8  | 0.094   |
| rs8050136           | 2(996/3694)                  | Random            | 1.15 | 0.96-1.38 | 0.131   | 68.4  | 0.075   |

a.  $P$  value for Z test

b.  $P$  value based on Q test for between-study heterogeneity

doi: 10.1371/journal.pone.0082133.t002

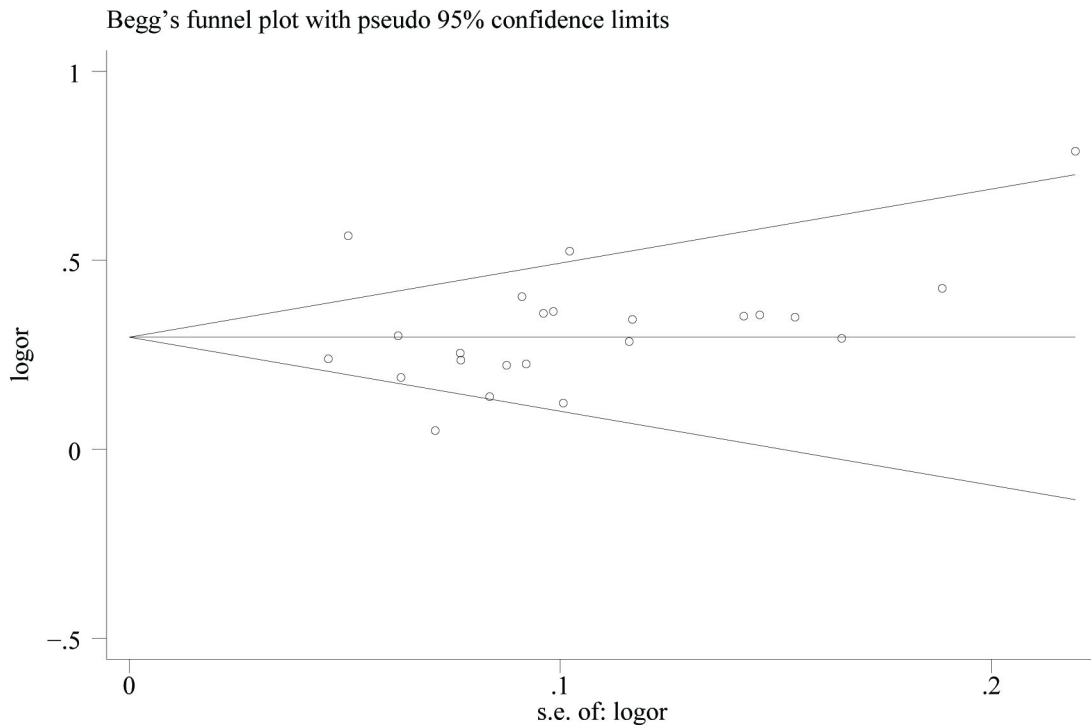

**Figure 3.** Begg's funnel plot for publication bias in an additive model.

doi: 10.1371/journal.pone.0082133.g003

**Potential publication bias**

The Begg's funnel plot did not reveal any evidence of obvious asymmetry (Figure 3), and both Egger's test and

Begg's test were not significant (Begg's test:  $P=0.064$ ; Egger's test:  $P=0.637$ ). Therefore, no publication bias was detected in this meta-analysis.

## Discussion

In this study, our meta-analysis confirmed that variant in *FTO* gene was significantly associated with increased risk of overweight/obesity in children and adolescents. The stability of sensitivity analysis and no publication bias confirmed the positive association. Further subgroup analyses indicated the similar trends among subgroups of overweight and obesity, data with and without adjustment, different ethnicities (Caucasians, Asians, and Amerindians), and each of three polymorphisms investigated (rs9939609, rs1421085, rs1558902).

Between-study heterogeneity is usually common in meta-analysis of genetic association study[45]. As the evidence of heterogeneity in our study, subgroup analyses based on ethnicity, categories of cases, adjustment, and types of polymorphisms were used to assess the potential source and impact of heterogeneity. Nevertheless, there were still between-study heterogeneities in some subgroups, suggesting other unknown influence factors.

The underlying biological mechanism on how the variant in *FTO* contributes to the increased risk of obesity is largely unknown[7]. For animal experiments, there is a demonstration that *FTO* plays an important role in energy homeostasis, metabolism and adipogenesis [46,47]. To elucidate the way in which the *FTO* variant affects fat mass may help us to understand the pathogenesis of obesity[33]. *FTO* gene contributes to weight gain mainly by increasing in energy intake[32] and diminishing satiety sensation[27]. Meanwhile, mutation of *FTO* was influenced by higher fatty acid intake[36]. Some reports have suggested that *FTO* gene products influence the regulation of food intake, as children carrying the risk allele tend to choose higher energy and more fat food[48,49]. Besides, carriers with high-risk allele for *FTO* gene is more resistant to the insulin effects than the ones with non-risk allele of genetic variant[50]. The *FTO* gene is expressed in many tissues, including human hypothalamus, pituitary and adrenal glands[38]. Regarding slight change of TSH (Thyroid Stimulating Hormone) levels associating with weight gain and fat mass[51], influence of *FTO* variants on pituitary function has a strong association with TSH levels, for both of them are expressed or produced in pituitary gland[32]. However, *FTO* genetic effects do not begin to influence early onset obesity before the age of 7 years[52]. Despite genotyping of *FTO* in childhood may be effective in identifying individuals genetically predisposed to obesity, the lifestyle factors also should be considered [35]. Further in-depth researches are needed to explore the mechanism by which *FTO* associated with overweight/obesity.

The result of pooled effect for rs9939609 genetic variant of *FTO* gene with overweight/obesity risk in our meta-analysis (OR=1.35; 95%CI: 1.27-1.44) was similar with previous overall result of rs9939609 by Peng et al. (OR=1.31; 95%CI: 1.26-1.36)[9], but was also similar with that of rs17782313 (or

its proxy) near the *MC4R* gene, another obesity susceptibility gene, in children reported by Xi et al. (OR=1.26; 95%CI: 1.19-1.33)[53]. However, we did not identify the association between the *FTO* gene rs8050136 and overweight/obesity risk (OR=1.15; 95%CI: 0.96-1.38), in spite of a significant positive association found by Peng et al. (OR=1.25; 95%CI: 1.13-1.38) [9]. The overall analysis also showed no evidence of association between rs9939609 (or its proxy) and overweight/obesity risk in African children and adolescents. The result might be explained by some other different biological effects. Aerobic capacity of African American might be lower than white children[54]. Moreover, fasting insulin and acute insulin response were significantly higher in African American, while insulin sensitivity was significantly lower[54]. Further investigations on rs8050136 and African should be pursued to determine the association of *FTO* gene with overweight/obesity.

Despite the many strengths compared to individual studies, there are several limitation in our meta-analysis. First, some potential confounding factors were not controlled for because our pooled estimate was based primarily on unadjusted estimates and CIs. Second, different criteria of obesity and overweight were included in our meta-analysis. Therefore, these results should be interpreted with caution. Trying to overcome this drawback, we performed subgroup analysis by ethnicity, which indirectly reflected the differences in obesity and overweight criteria as the cut-offs were similar in the same ethnic group. Third, a number of obesity-related clinical and biochemical parameters were not estimated in this meta-analysis. Forth, owing to insufficient original data from the included studies, the effects of gene-gene and gene-environment interactions were not assessed.

In summary, our meta-analysis results indicated that rs9939609 polymorphism in the *FTO* gene was significantly associated with overweight/obesity risk in children and adolescents. However, further studies considering gene-gene and gene-environment interaction should be conducted to investigate the association. Furthermore, better estimates of the risk would be obtained in future prospective cohort studies, as well as more mechanism researches are also needed to clarify the association of *FTO* gene with overweight/obesity.

## Supporting Information

**Checklist S1. PRISMA checklist.**  
(DOC)

## Author Contributions

Conceived and designed the experiments: CL. Performed the experiments: SM YC. Analyzed the data: YC. Contributed reagents/materials/analysis tools: SM. Wrote the manuscript: CL.

## References

- Dixon JB (2010) The effect of obesity on health outcomes. *Mol Cell Endocrinol* 316: 104-108. doi:10.1016/j.mce.2009.07.008. PubMed: 19628019.
- Ogden CL, Carroll MD, Kit BK, Flegal KM (2012) Prevalence of obesity and trends in body mass index among US children and adolescents, 1999-2010. *JAMA* 307: 483-490. doi:10.1001/jama.2012.40. PubMed: 22253364.
- Parsons TJ, Power C, Logan S, Summerbell CD (1999) Childhood predictors of adult obesity: a systematic review. *Int J Obes Relat Metab Disord* 23: S1-107. doi:10.1038/sj.ijo.0800953. PubMed: 10641588.
- Whitaker RC, Wright JA, Pepe MS, Seidel KD, Dietz WH (1997) Predicting obesity in young adulthood from childhood and parental obesity. *N Engl J Med* 337: 869-873. doi:10.1056/NEJM199709253371301. PubMed: 9302300.
- Deckelbaum RJ, Williams CL (2001) Childhood obesity: the health issue. *Obes Res* 9: 239S-243S. doi:10.1038/oby.2001.125. PubMed: 11707548.
- Lakshman R, Elks CE, Ong KK (2012) Childhood Obesity. *Circulation* 126: 1770-1779. doi:10.1161/CIRCULATIONAHA.111.047738. PubMed: 23027812.
- Zhao J, Grant SF (2011) Genetics of childhood obesity. *J Obes* 2011:845148
- Frayling TM, Timpson NJ, Weedon MN, Zeggini E, Freathy RM et al. (2007) A common variant in the FTO gene is associated with body mass index and predisposes to childhood and adult obesity. *Science* 316: 889-894. doi:10.1126/science.1141634. PubMed: 17434869.
- Peng S, Zhu Y, Xu F, Ren X, Li X et al. (2011) FTO gene polymorphisms and obesity risk: a meta-analysis. *BMC Med* 9: 71. doi: 10.1186/1741-7015-9-71. PubMed: 21651756.
- Higgins JP, Thompson SG, Deeks JJ, Altman DG (2003) Measuring inconsistency in meta-analyses. *BMJ* 327: 557-560. doi:10.1136/bmj.327.7414.557. PubMed: 12958120.
- DerSimonian R, Laird N (1986) Meta-analysis in clinical trials. *Control Clin Trials* 7: 177-188. doi:10.1016/0197-2456(86)90046-2. PubMed: 3802833.
- Mantel N, Haenszel W (2004) Statistical aspects of the analysis of data from retrospective studies of disease. *Challenge of Epidemiology: Issues and Selected Readings* 1: 533-553. PubMed: 13655060.
- Begg CB, Mazumdar M (1994) Operating characteristics of a rank correlation test for publication bias. *Biometrics* 50: 1088-1101. doi: 10.2307/2533446. PubMed: 7786990.
- Egger M, Smith GD, Schneider M, Minder C (1997) Bias in meta-analysis detected by a simple, graphical test. *BMJ* 315: 629-634. doi: 10.1136/bmj.315.7109.629. PubMed: 9310563.
- Cecil JE, Tavendale R, Watt P, Hetherington MM, Palmer CNA (2008) An obesity-associated FTO gene variant and increased energy intake in children. *N Engl J Med* 359: 2558-2566. doi:10.1056/NEJMoa0803839. PubMed: 19073975.
- Hassanein MT, Lyon HN, Nguyen TT, Akylibekova EL, Waters K et al. (2010) Fine mapping of the association with obesity at the FTO locus in African-derived populations. *Hum Mol Genet* 19: 2907-2916. doi: 10.1093/hmg/ddq178. PubMed: 20430937.
- Scott RA, Bailey MES, Moran CN, Wilson RH, Fuku N et al. (2010) FTO genotype and adiposity in children: physical activity levels influence the effect of the risk genotype in adolescent males. *Eur J Hum Genet* 18: 1339-1343. doi:10.1038/ejhg.2010.131. PubMed: 20717169.
- Liu G, Zhu H, Dong Y, Podolsky RH, Treiber FA et al. (2011) Influence of common variants in FTO and near INSIG2 and MC4R on growth curves for adiposity in African- and European-American youth. *Eur J Epidemiol* 26: 463-473. doi:10.1007/s10654-011-9583-4. PubMed: 21544599.
- Elks CE, Loos RJF, Sharp SJ, Langenberg C, Ring SM et al. (2010) Genetic markers of adult obesity risk are associated with greater early infancy weight gain and growth. *PLoS Med* 7:e1000284. PubMed: 20520848.
- Hinney A, Nguyen TT, Scherag A, Friedel S, Brönnner G et al. (2007) Genome wide association (GWA) study for early onset extreme obesity supports the role of fat mass and obesity associated gene (FTO) variants. *PLOS ONE* 2: e1361. doi:10.1371/journal.pone.0001361. PubMed: 18159244.
- Müller T, Hinney A, Scherag A, Nguyen T, Schreiner F, et al. (2008) 'Fat mass and obesity associated' gene (FTO): No significant association of variant rs9939609 with weight loss in a lifestyle intervention and lipid metabolism markers in German obese children and adolescents. *BMC Med Genet* 9: 85.
- Zavattari P, Loche A, Pilia S, Ibba A, Moi L et al. (2011) rs9939609 in the FTO gene is associated with obesity but not with several biochemical parameters in Sardinian obese children. *Ann Hum Genet* 75: 648-654. doi:10.1111/j.1469-1809.2011.00674.x. PubMed: 21913894.
- Fang H, Li Y, Du S, Hu X, Zhang Q et al. (2010) Variant rs9939609 in the FTO gene is associated with body mass index among Chinese children. *BMC Med Genet* 11: 136. doi:10.1186/1471-2350-11-136. PubMed: 20858286.
- González JR, González-Carpio M, Hernández-Sáez R, Vargas VS, Hidalgo GT et al. (2012) FTO risk haplotype among early onset and severe obesity cases in a population of Western Spain. *Obesity (Silver Spring)* 20: 909-915. doi:10.1038/oby.2011.325. PubMed: 22030988.
- Almén MS, Rask-Andersen M, Jacobsson J, Ameer A, Kalnina I et al. (2012) Determination of the obesity-associated gene variants within the entire FTO gene by ultra-deep targeted sequencing in obese and lean children. *Int J Obes* 37: 424-431.
- Ntalla I, Panoutsopoulou K, Vlachou P, Southam L, William Rayner N et al. (2013) Replication of established common genetic variants for adult BMI and childhood obesity in Greek adolescents: The TEENAGE study. *Ann Hum Genet* 77: 268-274. doi:10.1111/ahg.12012. PubMed: 23347264.
- Wardle J, Carnell S, Haworth CMA, Farooqi IS, O'Rahilly S et al. (2008) Obesity associated genetic variation in FTO is associated with diminished satiety. *J Clin Endocrinol Metab* 93: 3640-3643. doi: 10.1210/jc.2008-0472. PubMed: 18583465.
- Jacobsson JA, Danielsson P, Svensson V, Klovins J, Gyllensten U et al. (2008) Major gender difference in association of FTO gene variant among severely obese children with obesity and obesity related phenotypes. *Biochem Biophys Res Commun* 368: 476-482. doi: 10.1016/j.bbrc.2008.01.087. PubMed: 18249188.
- Lee HJ, Kang JH, Ahn Y, Ahn BG, Lee JY et al. (2010) Effects of common FTO gene variants associated with BMI on dietary intake and physical activity in Koreans. *Clin Chim Acta* 411: 1716-1722. doi: 10.1016/j.cca.2010.07.010. PubMed: 20650268.
- Xi B, Shen Y, Zhang M, Liu X, Zhao X et al. (2010) The common rs9939609 variant of the fat mass and obesity-associated gene is associated with obesity risk in children and adolescents of Beijing, China. *BMC Med Genet* 11: 107. doi:10.1186/1471-2156-11-107. PubMed: 20598163.
- Mangge H, Renner W, Almer G, Weghuber D, Möller R, et al. (2011) Rs9939609 variant of the fat mass and obesity-associated gene and trunk obesity in adolescents. *J Obes* 2011:186368
- Dwivedi OP, Tabassum R, Chauhan G, Ghosh S, Marwaha RK et al. (2012) Common variants of FTO are associated with childhood obesity in a cross-sectional study of 3,126 urban Indian children. *PLOS ONE* 7: e47772. doi:10.1371/journal.pone.0047772. PubMed: 23091647.
- Luczynski W, Zalewski G, Bossowski A (2012) The association of the FTO rs9939609 polymorphism with obesity and metabolic risk factors for cardiovascular diseases in Polish children. *J Physiol Pharmacol* 63: 241-248. PubMed: 22791637.
- Riffo B, Asenjo S, Sáez K, Aguayo C, Muñoz I et al. (2012) FTO gene is related to obesity in Chilean Amerindian children and impairs HOMA-IR in prepubertal girls. *Pediatr Diabetes* 13: 384-391. doi:10.1111/j.1399-5448.2011.00834.x. PubMed: 22141579.
- Lauria F, Siani A, Bammann K, Foraita R, Huybrechts I et al. (2012) Prospective analysis of the association of a common variant of FTO (rs9939609) with adiposity in children: results of the IDEFICS study. *PLOS ONE* 7: e48876. doi:10.1371/journal.pone.0048876. PubMed: 23155422.
- Molerés A, Ochoa MC, Rendo-Urteaga T, Martínez-González MA, Azcona San Julián MC et al. (2012) Dietary fatty acid distribution modifies obesity risk linked to the rs9939609 polymorphism of the fat mass and obesity-associated gene in a Spanish case-control study of children. *Br J Nutr* 107: 533-538. doi:10.1017/S0007114511003424. PubMed: 21798115.
- Albuquerque D, Nóbrega C, Manco L (2013) Association of FTO polymorphisms with obesity and obesity-related outcomes in Portuguese children. *PLOS ONE* 8: e54370. doi:10.1371/journal.pone.0054370. PubMed: 23342142.
- Dina C, Meyre D, Gallina S, Durand E, Körner A et al. (2007) Variation in FTO contributes to childhood obesity and severe adult obesity. *Nat Genet* 39: 724-726. doi:10.1038/ng2048. PubMed: 17496892.
- Meyre D, Delplanque J, Chèvre JC, Lecoœur C, Lobbens S et al. (2009) Genome-wide association study for early-onset and morbid adult obesity identifies three new risk loci in European populations. *Nat Genet* 41: 157-159. doi:10.1038/ng.301. PubMed: 19151714.



40. Cauchi S, Stutzmann F, Cavalcanti-Proença C, Durand E, Pouta A et al. (2009) Combined effects of MC4R and FTO common genetic variants on obesity in European general populations. *J Mol Med (Berl)* 87: 537-546. doi:10.1007/s00109-009-0451-6. PubMed: 19255736.
41. Mejía-Benítez A, Klünder-Klünder M, Yengo L, Meyre D, Aradillas C et al. (2013) Analysis of the contribution of FTO, NPC1, ENPP1, NEGR1, GNPDA2 and MC4R genes to obesity in Mexican children. *BMC Med Genet* 14: 21. doi:10.1186/1471-2156-14-21. PubMed: 23375129.
42. Okuda M, Hinoda Y, Okayama N, Suehiro Y, Shirabe K et al. (2011) Association between the FTO gene and overweight in Japanese children and adolescents. *Pediatr Diabetes* 12: 494-500. doi:10.1111/j.1399-5448.2010.00727.x. PubMed: 21443588.
43. Scherag A, Dina C, Hinney A, Vatin V, Scherag S et al. (2010) Two new loci for body-weight regulation identified in a joint analysis of genome-wide association studies for early-onset extreme obesity in French and German study groups. *PLOS Genet* 6 (4):e1000916.
44. Grant SFA, Li M, Bradfield JP, Kim CE, Annaiah K et al. (2008) Association analysis of the FTO gene with obesity in children of Caucasian and African ancestry reveals a common tagging SNP. *PLOS ONE* 3: e1746. doi:10.1371/journal.pone.0001746. PubMed: 18335027.
45. Munafò MR, Flint J (2004) Meta-analysis of genetic association studies. *Trends Genet* 20: 439-444. doi:10.1016/j.tig.2004.06.014. PubMed: 15313553.
46. Church C, Lee S, Bagg EAL, McTaggart JS, Deacon R et al. (2009) A mouse model for the metabolic effects of the human fat mass and obesity associated FTO gene. *PLOS Genet* 5:e1000599.
47. Fischer J, Koch L, Emmerling C, Vierkotten J, Peters T et al. (2009) Inactivation of the Fto gene protects from obesity. *Nature* 458: 894-898. doi:10.1038/nature07848. PubMed: 19234441.
48. Tanofsky-Kraff M, Han JC, Anandalingam K, Shomaker LB, Columbo KM et al. (2009) The FTO gene rs9939609 obesity-risk allele and loss of control over eating. *Am J Clin Nutr* 90: 1483-1488. doi:10.3945/ajcn.2009.28439. PubMed: 19828706.
49. Timpson NJ, Emmett PM, Frayling TM, Rogers I, Hattersley AT et al. (2008) The fat mass–and obesity-associated locus and dietary intake in children. *Am J Clin Nutr* 88: 971-978. PubMed: 18842783.
50. Tschritter O, Preissl H, Yokoyama Y, Machicao F, Häring HU et al. (2007) Variation in the FTO gene locus is associated with cerebrocortical insulin resistance in humans. *Diabetologia* 50: 2602-2603. doi:10.1007/s00125-007-0839-1. PubMed: 17917711.
51. Biondi B (2010) Thyroid and obesity: An intriguing relationship. *J Clin Endocrinol Metab* 95: 3614-3617. doi:10.1210/jc.2010-1245. PubMed: 20685890.
52. Hakanen M, Raitakari OT, Lehtimäki T, Peltonen N, Pahkala K et al. (2009) FTO genotype is associated with body mass index after the age of seven years but not with energy intake or leisure-time physical activity. *J Clin Endocrinol Metab* 94: 1281-1287. doi:10.1210/jc.2008-1199. PubMed: 19158205.
53. Xi B, Chandak GR, Shen Y, Wang Q, Zhou D (2012) Association between common polymorphism near the MC4R gene and obesity risk: a systematic review and meta-analysis. *PLOS ONE* 7: e45731. doi:10.1371/journal.pone.0045731. PubMed: 23049848.
54. Goran MI (2001) Metabolic precursors and effects of obesity in children: a decade of progress, 1990–1999. *Am J Clin Nutr* 73: 158-171. PubMed: 11157310.
